# Supplementary material for: Barriers that limit the implementation of thermal fogging for the control of dengue in Colombia: a study of mixed methods
Source: Springer Nature journal article supplement (doi:10.1186/s12889-019-7029-1), 2019-05-30
Supplement: MOESM1 [file 16761036]

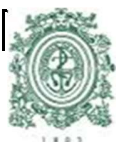

UNIVERSIDAD DE ANTIOQUIA

### Barriers that limit the implementation of thermal fogging for the control of dengue in Colombia

#### CONFIDENTIAL

The information contained in this questionnaire is confidential, it will only be used for research purposes and the results will be presented anonymously

#### QUESTIONNAIRE

Code

1 Date

2 Neighborhood

3 Commune

#### PERSONAL INFORMATION

4 Full name

5 Date of birth

6 Address

7 Telephone number  8 Cell phone

9 Gender Man  Woman

10 Educational level achieved

|                       |                      |                             |                      |                  |                      |
|-----------------------|----------------------|-----------------------------|----------------------|------------------|----------------------|
| None                  | <input type="text"/> | High school incomplete      | <input type="text"/> | Higher education | <input type="text"/> |
| Elementary incomplete | <input type="text"/> | High school                 | <input type="text"/> | Postgraduate     | <input type="text"/> |
| Elementary complete   | <input type="text"/> | Higher education incomplete | <input type="text"/> |                  |                      |

11 What is your occupation?

|           |                      |          |                      |            |                      |
|-----------|----------------------|----------|----------------------|------------|----------------------|
| Housewife | <input type="text"/> | Employee | <input type="text"/> | unemployed | <input type="text"/> |
| Student   | <input type="text"/> | Informal | <input type="text"/> | retired    | <input type="text"/> |

12 Does anyone of legal age stay at home?

|                     |                      |                       |                      |                   |                      |
|---------------------|----------------------|-----------------------|----------------------|-------------------|----------------------|
| All the time        | <input type="text"/> | Only at the afternoon | <input type="text"/> | Only in the night | <input type="text"/> |
| Only in the morning | <input type="text"/> |                       |                      |                   |                      |

13 How long have you lived in this neighborhood? Years  Months

#### SENSITIZATION

|                                                                        | Yes                  | No                   |
|------------------------------------------------------------------------|----------------------|----------------------|
| 14 Did the official identify himself?                                  | <input type="text"/> | <input type="text"/> |
| 15 Was the official polite?                                            | <input type="text"/> | <input type="text"/> |
| 16 Did the official say there are cases of dengue in the neighborhood? | <input type="text"/> | <input type="text"/> |
| 17 Did the official explain clearly why fumigation is necessary?       | <input type="text"/> | <input type="text"/> |
| 18 Did the official explain the procedure to be performed?             | <input type="text"/> | <input type="text"/> |

#### THERMAL FOGGING

19 Did you accept that the fumigation was carried out inside the dwelling? Yes  No

20 Do you think fumigation is beneficial to prevent dengue? Yes  No

21 Why?

22 I will read a statement about the fumigation and you will answer Yes o Not according your consideration

|                              | Y                              | N                              | NK                             |                               | Y                              | N                              | NK                             |
|------------------------------|--------------------------------|--------------------------------|--------------------------------|-------------------------------|--------------------------------|--------------------------------|--------------------------------|
| Kill mosquitoes              | <input type="text" value="1"/> | <input type="text" value="0"/> | <input type="text" value="2"/> | Affects the people's health   | <input type="text" value="1"/> | <input type="text" value="0"/> | <input type="text" value="2"/> |
| Control pest                 | <input type="text" value="1"/> | <input type="text" value="0"/> | <input type="text" value="2"/> | Affects pets' Health          | <input type="text" value="1"/> | <input type="text" value="0"/> | <input type="text" value="2"/> |
| Protects from dengue         | <input type="text" value="1"/> | <input type="text" value="0"/> | <input type="text" value="2"/> | Damage furniture in the house | <input type="text" value="1"/> | <input type="text" value="0"/> | <input type="text" value="2"/> |
| It's free                    | <input type="text" value="1"/> | <input type="text" value="0"/> | <input type="text" value="2"/> | Causes bad smell              | <input type="text" value="1"/> | <input type="text" value="0"/> | <input type="text" value="2"/> |
| The officials generate trust | <input type="text" value="1"/> | <input type="text" value="0"/> | <input type="text" value="2"/> | Harm the environment          | <input type="text" value="1"/> | <input type="text" value="0"/> | <input type="text" value="2"/> |

23 Which does institution do the fumigation?

Secretary of Health of Medellin  Private company   
firemen  Do not know  Other, which

24 Has the house been visited previously to be fumigate whit thermal-fogging?

Yes  No  Do not remember

25 When was the last time that the house was fumigated with thermal-fogging?

Not applicable  Between 7-12 months  More than two years   
Less than three months  Between 1-2 years  Do not remember   
Between 3-6 months

26 How many times in the last year?

None  twice  More than three times   
Once  Three times  Do not remember

27 When the officials of Secretary of Health come to perform the fumigation with thermal-fogging Do you accept?

Does not apply  sometimes   
always  Never

### KNOWLEDGE AND PRACTICES

28 How is dengue transmitted?

Eating contaminated food and/or drinking contaminated water  Contact with a sick person   
For living near to streams  Garbage around the house   
Lack of cleanliness at home  Do not know   
Mosquito bite  Other? which

29 Where does mosquitoes that transmit dengue breed?

Do not apply  Stagnant clear water  Do not know   
Stagnant dirty water  trees  Other? which   
Dumpsters  Streams

**30 What symptoms do you associate with dengue?**

|                       |   |                   |   |              |    |
|-----------------------|---|-------------------|---|--------------|----|
| fever                 | 1 | Headache          | 5 | Hemorrhage   | 9  |
| sickness/threw up     | 2 | rash              | 6 | Other? which | 10 |
| Muscle and joint pain | 3 | weakness          | 7 |              |    |
| Diarrhea              | 4 | retro-ocular pain | 8 |              |    |

**31 Do you think dengue disease to be?**

|                   |   |             |   |             |   |
|-------------------|---|-------------|---|-------------|---|
| Little severe     | 1 | Very severe | 3 | Do not know | 4 |
| Moderately severe | 2 |             |   |             |   |

**32 Have you, a relative or someone close to you been diagnosed with dengue?**

|     |   |
|-----|---|
| Yes | 1 |
| No  | 0 |

**33 How long ago did you or your relative diagnose with dengue?**

|                        |   |                     |   |                     |   |
|------------------------|---|---------------------|---|---------------------|---|
| Do not apply           | 1 | Between 7-12 months | 4 | More than two years | 6 |
| Less than three months | 2 | Between 1-2 years   | 5 | Do not remember     | 7 |
| Between 3-6 months     | 3 |                     |   |                     |   |

**34 What precautions do you take to prevent dengue?**

|                                        | Y | N | N.A. |                                 | Y | N | N.A. |
|----------------------------------------|---|---|------|---------------------------------|---|---|------|
| Use insecticides to fumigate the house | 1 | 0 | 2    | Cover water containers          | 1 | 0 | 2    |
| Eliminates water deposits              | 1 | 0 | 2    | Participates in SSM's campaigns | 1 | 0 | 2    |
| Wash water deposits                    | 1 | 0 | 2    | Other? which                    | 1 | 0 | 2    |
| Use repellents                         | 1 | 0 | 2    |                                 |   |   |      |
| Close doors and windows                | 1 | 0 | 2    |                                 |   |   |      |

**HOUSING INFORMATION**

**35 Number of inhabitants in the dwelling**

**36 How many rooms does the house have (living room included)?**

**37 Socioeconomic stratum**

**38 How do you get water for the house?**

|              |   |                          |   |              |   |
|--------------|---|--------------------------|---|--------------|---|
| Aqueduct EPM | 1 | Rural aqueduct           | 4 | Other? which | 6 |
| rainwater    | 2 | Birth of water/waterhole | 5 |              |   |
| neighbors    | 3 |                          |   |              |   |

**39 Do you have a pet?**

|     |   |    |   |
|-----|---|----|---|
| Yes | 1 | No | 0 |
|-----|---|----|---|

**40 What kind of pet?**

|              |   |        |   |              |   |
|--------------|---|--------|---|--------------|---|
| Do not apply | 1 | Cat    | 3 | birds        | 5 |
| Dog          | 2 | Fishes | 4 | Other? which | 6 |
|              |   |        |   |              |   |

**41 Do you have containers without cover that can store water?**

|     |   |
|-----|---|
| Yes | 1 |
| No  | 0 |

**42 What kind of containers**

|              | Yes | No |      | Yes | No |
|--------------|-----|----|------|-----|----|
| Do not apply | 1   | 0  | Tank | 1   | 0  |

|             |   |   |
|-------------|---|---|
| Buckets     | 1 | 0 |
| Cans        | 1 | 0 |
| Flower vase | 1 | 0 |

|              |   |   |
|--------------|---|---|
| Bottles      | 1 | 0 |
| Other? which | 1 | 0 |
|              |   |   |

**43 Have you felt or seen mosquitoes inside home?**

**Yes**  **No**

**Official who carries out the sensitization**

**filled by:**
